# Supplementary material
Source: Research Square preprint supplement (doi:10.21203/rs.3.rs-8652998/v1)
Supplement: Supplementary file 1 [file 671aa61b4699850dcb675783.docx]

**Supplementary file**

**Table S1 Multinomial Logistic Regression (RRR, 95% CI, significance) of marital control among DHS Malawi 2005-2016**

| **Covariate** | **Safe vs High** | **Low vs High** | **Moderate vs High** |
| --- | --- | --- | --- |
| Woman’s age | 1.01 (1.00–1.01) ** | 1.00 (0.99–1.01) | 1.00 (0.99–1.01) |
| Primary education | 1.04 (0.89–1.22) | 1.02 (0.87–1.20) | 1.10 (0.94–1.30) |
| Secondary education | 1.23 (0.93–1.63) | 1.09 (0.82–1.46) | 1.30 (0.97–1.74) * |
| Higher education | 2.39 (1.16–4.96) ** | 2.10 (1.01–4.40) ** | 1.88 (0.87–4.06) |
| Poorer | 0.99 (0.86–1.14) | 1.02 (0.88–1.18) | 1.10 (0.95–1.27) |
| Middle | 1.04 (0.90–1.20) | 1.11 (0.96–1.29) | 1.07 (0.92–1.24) |
| Richer | 0.92 (0.79–1.07) | 1.12 (0.96–1.31) | 1.13 (0.97–1.32) |
| Richest | 0.91 (0.75–1.09) | 1.09 (0.90–1.31) | 1.15 (0.95–1.39) |
| Rural | 0.94 (0.80–1.10) | 0.98 (0.83–1.14) | 0.98 (0.84–1.15) |
| Central region | 0.93 (0.77–1.12) | 1.05 (0.87–1.27) | 0.85 (0.70–1.03) * |
| Southern region | 1.37 (1.15–1.65) *** | 1.32 (1.10–1.59) ** | 1.02 (0.85–1.22) |
| Lomwe | 0.84 (0.71–1.00) ** | 0.98 (0.83–1.17) | 0.87 (0.73–1.03) |
| Tumbuka | 0.94 (0.75–1.16) | 1.06 (0.86–1.32) | 0.94 (0.76–1.17) |
| Yao | 0.87 (0.70–1.08) | 0.77 (0.62–0.96) ** | 0.75 (0.60–0.94) ** |
| Ngoni | 1.19 (1.02–1.40) ** | 1.02 (0.86–1.20) | 1.02 (0.86–1.20) |
| Other ethnicities | 1.00 (0.85–1.19) | 1.06 (0.89–1.25) | 0.98 (0.82–1.17) |
| CCAP | 1.01 (0.87–1.18) | 0.98 (0.83–1.14) | 0.98 (0.83–1.15) |
| Other Christian | 0.92 (0.82–1.04) | 0.96 (0.85–1.08) | 1.01 (0.89–1.14) |
| Muslim | 1.02 (0.83–1.27) | 1.21 (0.97–1.50) * | 1.65 (1.32–2.05) *** |
| Other / None | 0.54 (0.32–0.90) ** | 0.71 (0.43–1.16) | 1.02 (0.64–1.63) |
| Professional | 0.75 (0.55–1.03) * | 1.29 (0.91–1.82) | 1.01 (0.72–1.43) |
| Sales / services | 0.74 (0.56–0.97) ** | 1.16 (0.85–1.58) | 1.04 (0.77–1.42) |
| Agriculture | 0.86 (0.66–1.12) | 1.41 (1.05–1.89) ** | 1.21 (0.90–1.62) |
| Manual labour | 0.73 (0.56–0.96) ** | 1.17 (0.86–1.59) | 1.10 (0.81–1.49) |
| Other occupation | 0.75 (0.49–1.16) | 1.36 (0.87–2.13) | 1.18 (0.75–1.86) |
| Husband drinks alcohol | 0.51 (0.46–0.56) *** | 0.63 (0.57–0.69) *** | 0.74 (0.68–0.82) *** |
| Husband primary education | 1.25 (1.09–1.44) ** | 1.27 (1.10–1.46) ** | 1.13 (0.98–1.31) * |
| Husband secondary education | 1.39 (1.17–1.66) *** | 1.38 (1.15–1.65) *** | 1.28 (1.06–1.53) ** |
| Husband higher education | 2.10 (1.39–3.16) *** | 2.09 (1.38–3.18) *** | 1.68 (1.09–2.58) ** |
| Age difference | 0.99 (0.99–1.00) ** | 1.00 (0.99–1.01) | 1.00 (0.99–1.01) |
| Education difference | 1.01 (0.99–1.03) | 1.01 (0.99–1.04) | 1.01 (0.97–1.01) |
